# Supplementary material for: Antimicrobial activity of bacteriophage derived triple fusion protein against Staphylococcus aureus
Source: PubMed Central journal article supplement (PMC6642909; doi:10.3934/microbiol.2019.2.158), 2019-06-25
Supplement: microbiol-05-02-158-s001.pdf [file microbiol-05-02-158-s001.pdf]

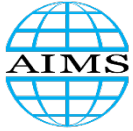

Research article

Antimicrobial activity of bacteriophage derived triple fusion protein against Staphylococcus aureus

Natalia Y. Kovalskaya1\*, Eleanor E. Herndon2, Juli A. Foster-Frey3, David M. Donovan3 and Rosemarie W. Hammond4

- 1 Floral and Nursery Plants Research Unit, U.S. National Arboretum, Agricultural Research Service, ORISE - U.S. Department of Agriculture, Beltsville, MD, USA
2 Kerry's Nursery, Miami, FL, USA
3 Animal Biosciences and Biotechnology Laboratory, U.S. Department of Agriculture, Agricultural Research Service, Beltsville, MD, USA
4 Molecular Plant Pathology Laboratory, U.S. Department of Agriculture, Agricultural Research Service, Beltsville, MD, USA

\* Correspondence: Email: Natalia.Kovalskaya@ars.usda.gov; Phone: 3015045203; FAX: 3015045449.

Table with 3 columns: Line number, DNA sequence, and motif label (TF or TFnt). The DNA sequences are shown with yellow highlighting on specific nucleotides.

|      |                                                                                                                 |            |
|------|-----------------------------------------------------------------------------------------------------------------|------------|
| 266  | TGCGAGGGCACTCAAGCGGAGCTGGTGGTCATGTAGTCATGTTTATTGACCCT<br>TGAGGGGTCATTCATCTGGTGGAGGTCATGTTGTTATGTTTCATCGATCCA    | TF<br>TFnt |
| 319  | GAAAATATCATTCACTGTAAGTGGGCAAATAATGGCATCACAGTGAACAATA<br>GAGAACATCATCCATTGCAACTGGGCTAATAACGGAATCACTGTTAATAACTA   | TF<br>TFnt |
| 372  | CAATCAGACAGCGGCTGCTAGTGGCTGGATGTATTGCTACGTTTACCGTTTGA<br>CAATCAAACAGCTGCTGCTTCAGGTTGGATGTATTGTTACGTTTATAGGCTTA  | TF<br>TFnt |
| 425  | AAAGCGGAGCTCTCGACGATGAAAAATCACAAGTATGTAGTGGTTTGGCTATG<br>AGTCTGGAGCTTTGGATGATGAAAAATCACAAGTTTGCTCTGGTCTTGCTATG  | TF<br>TFnt |
| 478  | GAAAATATGACATTACAAATTTAAATGCTAAACAAGATAAATCAAAGAATGG<br>GAGAAGTACGATATTACTAATTTGAACGCTAACGAGGATAAGTCTAAGAATGG   | TF<br>TFnt |
| 531  | GAGCGTGAAAGAGTTGAAACATATCTATTCAAACCATATTTAAAGGTAACAAGA<br>TTCTGTTAAGGAACCTTAAGCATATCTATTCAAACCATATTAAGGTAATAAGA | TF<br>TFnt |
| 584  | TTACAGCACAAAACCTAGTATTCAGGTGTGGTCATCCACAATGATTATGGT<br>TTACAGCTCCAAAACCTTCTATCCAAGGAGTTGTTATTCAATAACGATTACGGT   | TF<br>TFnt |
| 637  | AGTATGACACCTAGTCAATACTTACCATGGTTATATGCACGTGAGAATAACGG<br>TCAATGACTCCATCTCAATAACCTTCCCTGGTTGTATGCTAGAGAGAATAACGG | TF<br>TFnt |
| 690  | TACACACGTTAACGGTTGGGCTAGTGTATTGCAAATAGAAACGAAGTGCTTT<br>AACACATGTTAAAGGTTGGGCTTCTGTTTATGCTAATAGGAATGAGGTTCTTT   | TF<br>TFnt |
| 743  | GGTATCATCCGACAGACTACGTAGAGTGGCATGTGGTAATCAATGGGCAAAT<br>GGTACCATCCAACCTGATTATGTTGAGTGGCATGTGGAAATCAATGGGCTAAC   | TF<br>TFnt |
| 796  | GCTAACTTAATCGGATTTGAAGTGTGTGAGTCGTATCCTGGTAGAATCTCGGA<br>GCTAATTTGATCGGTTTTCGAAGTTTGCGAGTCATACCCTGGAAGAATTTCTGA | TF<br>TFnt |
| 849  | CAAATTATTCTTAGAAAATGAAGAAGCGACATTGAAAGTAGCTGCGGATGTGA<br>TAAGCTTTTTCTTGAAAATGAGGAGGCTACATTGAAGGTTGCTGCTGATGTTA  | TF<br>TFnt |
| 902  | TGAAGTCGTACGGATTACCAGTTAATCGCAACACTGTACGTCTGCATAACGAA<br>TGAAATCATACGGACTTCCAGTTAACAGAAACACTGTTAGGTTGCATAATGAG  | TF<br>TFnt |
| 955  | TTCTTCGGAACCTTCTGTCCACATCGTTCGTGGGACTTGCATGTTGGCAAAGG<br>TTTTTCGGTACATCATGTCCACATAGATCTTGGGATCTTCATGTTGGTAAAGG  | TF<br>TFnt |
| 1008 | TGAGCCTTACACAACCTACTAATATTAATAAAAATGAAAGACTACTTCATCAAAC                                                         | TF         |

|      |                                                                                                                  |            |
|------|------------------------------------------------------------------------------------------------------------------|------------|
|      | AGAGCCTTACACTACA ACTAATATTAATAAGATGAAAGATTACTTTATTAA GA                                                          | TFnt       |
| 1061 | GCATCAAACATTATTATGACGGTGGAAAGCTAGAAGTAAGCAAAGCAGCAACT<br>GGATTAAACATTATTACGATGGAGGAAAGCTTGAAGTTTCTAAAGCTGCTACT   | TF<br>TFnt |
| 1114 | ATCAAACAATCTGACGTTAAGCAAGAAGTTAAAAAGCAAGAAGCAAACAAAT<br>ATTAAAGCAATCTGATGTTAAACAAGAAGTTAAGAAA CAAGAGCTAAGCAAAT   | TF<br>TFnt |
| 1167 | TGTGAAAGCAACAGATTGGAACAGAATAAAGATGGCATTCTCGACGCTGCAA<br>TGTAAAGCTACTGATTGGAAGCAA AATAAGGATGGTATTCTTGATGCTGCTA    | TF<br>TFnt |
| 1220 | CACATGAACATTTCAGCACAAATGGTTGAATAATTACAAAAAGGATATGGTTAC<br>CACATGAGCATTCTGCTCAATGGTTGAATAACTACAAGAAAGGTTACGGATAT  | TF<br>TFnt |
| 1273 | GGCCCTTATCCATTAGGTATAAAATGGCGGTATGCACTACGGAGTTGATTTTTT<br>GGTCCATATCCTCTTGGAAATTAATGGTGGAAATGCATTACGGTGTGATTTCTT | TF<br>TFnt |
| 1326 | TATGAATATTGGAACACCAGTAAAAGCTATTTCAAGCGGAAAAATAGTTGAAG<br>TATGAACATCGGAACACCTGTTAAGGCTATTTCACTGGAAAAATTGTTGAAG    | TF<br>TFnt |
| 1379 | CTGGTTGGAGTAATTACGGAGGAGGTAATCAAATAGGTCTTATTGAAAATGAT<br>CTGGTTGGTCAAATTATGGAGGTGGA AATCAAATTGGACTTATTGAGAATGAT  | TF<br>TFnt |
| 1432 | GGAGTGCATAGACAATGGTATATGCATCTAAGTAAATATAATGTTAAAGTAGG<br>GGTGTTCATAGACAATGGTACATGCATTTGTCTAAGTATAACGTTAAAGTTGG   | TF<br>TFnt |
| 1485 | AGATTATGTCAAAGCTGGTCAAATAATCGGTTGGTCTGGAAGCACTGGTTATT<br>AGATTACGTTAAGGCTGGTCAAATTATTGGATGGTCAGGTTCTACTGGATATT   | TF<br>TFnt |
| 1538 | CTACAGCACCACATTTACACTTCCAAAGAATGGTTAATTCATTTTCAAATTCA<br>CAACAGCTCCACATCTTCATTTCCAAAGGATGGTTAACTCATTTTCTAACTCA   | TF<br>TFnt |
| 1591 | ACTGCCCAAGATCCAATGCCTTTCTTAAAGAGCGCAGGATATGGAAAAGCAGG<br>ACTGCTCAAGATCCAATGCCATTTCTTAAAGTCTGCTGGATATGGTAAAGCTGG  | TF<br>TFnt |
| 1644 | TGGTACAGTAACTCCAACGCCGAATACAGGTTGGAAAACAACAAATATGGCA<br>TGGAACAGTTACTCCAACACCTAATACTGGATGGAAGACAAATAAGTACGGTA    | TF<br>TFnt |
| 1697 | CACTATATAAATCAGAGTCAGCTAGCTTCACACCTAATACAGATATAATAACA<br>CTCTTTATAAGTCTGAATCAGCTTCTTTTACTCCTAACACAGATATTATCACA   | TF<br>TFnt |
| 1750 | AGAACGACTGGTCCATTTAGAAGCATGCCGAGTCAGGAGTCTTAAAGCAGG<br>AGAACA ACTGGACCTTTTAGATCAATGCCTCAATCTGGAGTTTGAAGGCTGG     | TF<br>TFnt |

|      |                                                                                            |      |
|------|--------------------------------------------------------------------------------------------|------|
| 1803 | TCAAACAATTCATTATGATGAAGTGATGAAACAAGACGGTCATGTTTGGGTAG                                      | TF   |
|      | TCAAAC <u>T</u> ATCCATTACGATGAGGTTATGAAACAAGATGGTCATGTTTGGGT <u>T</u> G                    | TFnt |
| 1856 | GTTATACAGGTAACAGTGGCCAACGTATTTACTTGCCTGTAGAACATGGAAT                                       | TF   |
|      | GTTAC <u>C</u> ACAGGA <u>A</u> AAT <u>T</u> CTGGTCAAAGGATATATCTTCCTGTTAGGACTTGGAA <u>C</u> | TFnt |
| 1909 | AAGTCTACTAATACTCTGGGTGTTCTGTGGGGAACATAAAGCTAGAGCATCA                                       | TF   |
|      | AAATCTACAAATACAT <u>T</u> AGGAGTCTCTGGGGTACAATCAAAXXXXXXCATCA                              | TFnt |
| 1962 | <i>CCATCACCATCACTGA</i>                                                                    | TF   |
|      | <i>CCATCACCATCACTGA</i>                                                                    | TFnt |

**Figure S1.** Plant-codon optimized sequence of *TF* gene. Upper line is sequence of original *TF* gene and lower line is codon-optimized sequence of *TF* gene (*TFnt*). Yellow boxes indicate modified sequences. Green box shows mutated restriction site that was present in original *TF* gene sequence and is absent in codon-optimized *TFnt* gene. Underline: start (ATG) and stop (TGA) codons. Italics: 6x His-tag

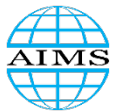

AIMS Press

© 2019 the Author(s), licensee AIMS Press. This is an open access article distributed under the terms of the Creative Commons Attribution License (<http://creativecommons.org/licenses/by/4.0>)
